# Supplementary material for: Adsorptive denitrogenation of fuel over molecularly imprinted poly-2-(1H-imidazol-2-yl)-4-phenol microspheres
Source: Royal Society of Chemistry journal article supplement (doi:10.1039/c8nj02818d), 2018-01-01
Supplement: c8nj02818d1.pdf [file c8nj02818d1.pdf]

## Adsorptive denitrogenation of fuel over molecularly imprinted poly-2-(1*H*-imidazol-2-yl)-4-phenol microspheres

M. S. Abdul-quadir<sup>a</sup>, R. van der Westhuizen<sup>b</sup>, W. Welthagen<sup>b</sup>, E. E. Ferg<sup>a</sup>, Z. R. Tshentu<sup>a</sup> and A. S. Ogunlaja<sup>a,\*</sup>

<sup>a</sup>Department of Chemistry, Nelson Mandela University, P.O. Box 77000, Port Elizabeth 6031, South Africa

<sup>b</sup>Analytical Technology, Sasol Technology (Pty) Limited, PO Box 1, Sasolburg 1947, South Africa

### Synthesis

*Non-imprinted microspheres:* 1.86 g of 2-(1*H*-imidazol-2-yl)-4-vinylphenol was dissolved into a solution containing 2 mL of ethylene glycol dimethacrylate and 1 mL of toluene. After homogeneity was achieved, 0.02 g of benzoyl peroxide, was added to the organic mixture. The resulting organic solution was transferred in drops into a 100 mL solution containing polyvinyl alcohol (PVA) (0.025 g) and NaCl (0.07 g) at 80°C and under stirring at 400 rpm. The reaction was allowed to proceed for 7 h under an argon atmosphere, after which the resulting microspheres were collected by filtration process followed by washing with warm methanol. *Anal. Found (%)* FT-IR (cm<sup>-1</sup>) 3371  $\nu$ (O-H), 1726  $\nu$ (C=O), 1630  $\nu$ (>NH), 1289  $\nu$ (C-N), 1148  $\nu$ (C-O-C).

### Adsorption Protocol for hydrotreated fuel

Adsorption studies for the removal of organonitrogen compounds was carried out by weighing 150 mg of imprinted microspheres (comprising of 50 mg quinoline-imprinted, 50 mg carbazole-imprinted and 50 mg pyrimidine-imprinted microspheres) as adsorbent. Adsorption proceeded under SPE manifold by conditioning imprinted microspheres at a vacuum pressure of 20 inHg with a solution of hexane followed by loading the hydrotreated diesel (3 mL hydrotreated diesel). Cyclohexane was employed to wash interfering molecules from the sorbent and finally N-compounds were eluted by using a mixture of acetonitrile: methanol (1:1).

### SI.1 Adsorption Kinetics and Isotherms

Kinetics: The kinetic mechanism that controls the adsorption process under batch study was monitored by using pseudo-first-order model (Eq. 4) and pseudo-second-order model (Eq. 5). In pseudo-first-order model the occupation rate of the adsorption sites is proportional to the number of unoccupied sites, while the pseudo-second-order assumes that adsorption takes place *via* a chemical reaction process i.e. chemisorption process.

$$\log(q_e - q_t) = \log q_e - \frac{K_1}{2.303}t \quad (4)$$

$$\frac{t}{q_t} = \frac{1}{q_e^2 K_2} + \frac{1}{q_e}t \quad (5)$$

where  $q_e$  and  $q_t$  (mg/g) are the amounts

of N-compounds adsorbed on the adsorbent at equilibrium and time  $t$ , respectively.

Isotherm: The adsorption behaviour of nitrogen compounds on imprinted microspheres was followed using the Langmuir and Freundlich isothermal equations (Eqns. 6 and 7).

$$\frac{C_e}{q_e} = \frac{C_e}{Q_m} + \frac{K_d}{Q_m} \quad (6)$$

$$\log q_e = \frac{1}{n} \log C_e + \log K \quad (7)$$

where  $q_e$  (mg/g) and  $C_e$  (mg/g) are the amount adsorbed at equilibrium and the equilibrium concentration, ( $Q_m$ ), is the theoretical maximum adsorption capacity at monolayer (mg/g), and  $K_d$  is the Langmuir constant (related to the affinity of adsorption sites). Freundlich constants  $k$  and  $n$  indicating adsorption capacity and intensity respectively were determined from the linear plot of  $\log q_e$  against  $\log C_e$ .

## **DATA**

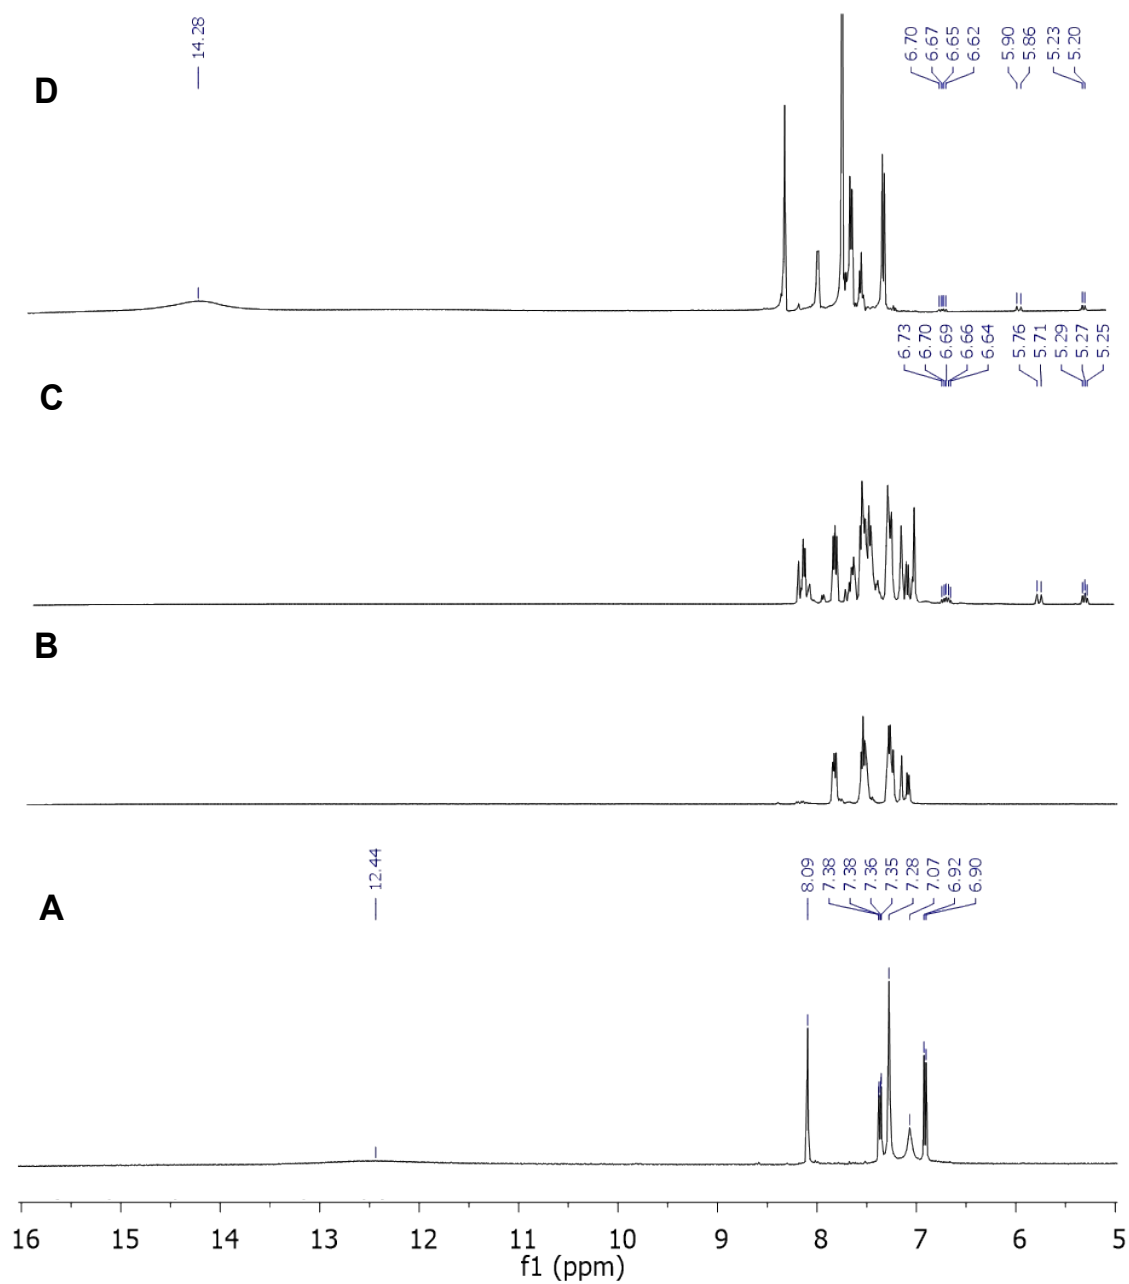

**Fig. S1**  $^1\text{H}$ -NMR spectra of (A) 4-bromo-2-(1*H*-imidazol-2-yl) phenol, (B) 2-(1-benzoyl-1*H*-imidazol-2-yl)-4-bromophenyl benzoate, (C) 2-(1-benzoyl-1*H*-imidazol-2-yl)-4-vinylphenyl benzoate and (D) 2-(1*H*-imidazol-2-yl)-4-vinyl phenol.

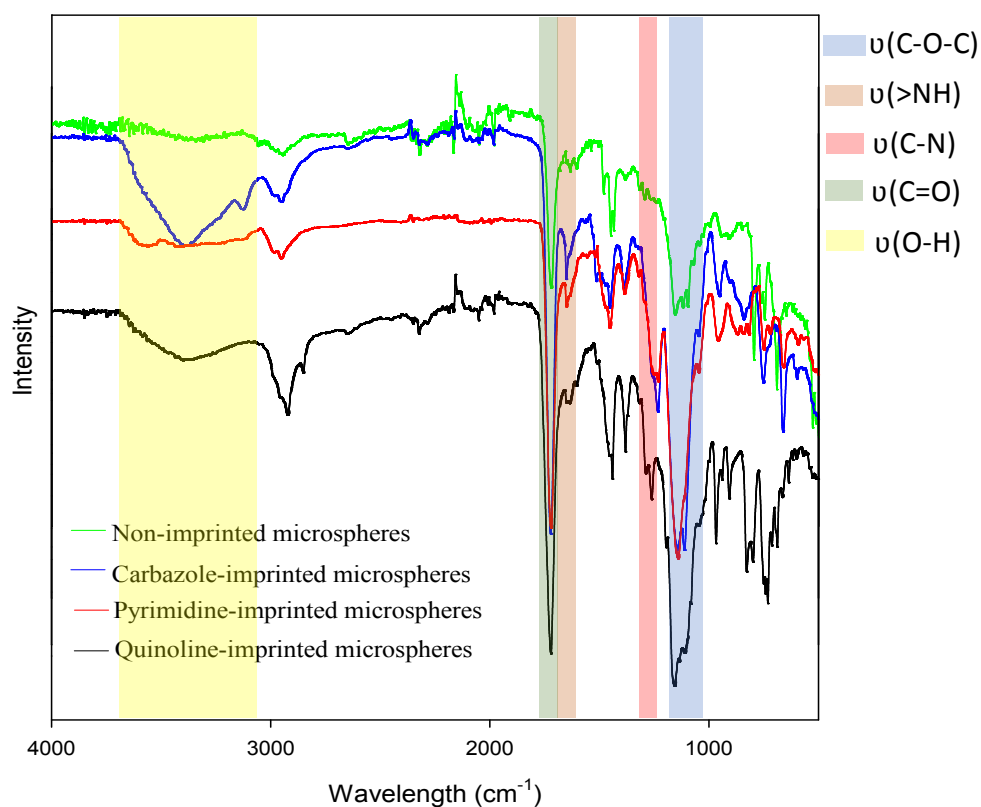

**Fig. S2:** FTIR spectra of (i) Non-imprinted microspheres (ii) Carbazole-imprinted microspheres (iii) Pyrimidine-imprinted microspheres and (iv) Quinoline imprinted microspheres.

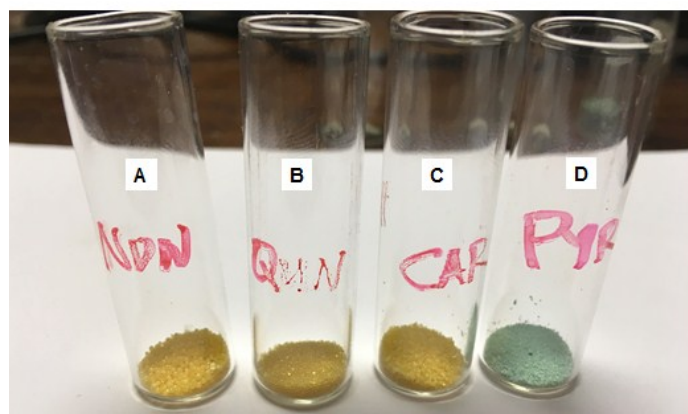

**Fig. S3.** Images of (A) non-imprinted microspheres, (B) quinoline-imprinted microspheres (QUNMIP), (C) carbazole-imprinted microspheres (CARMIP), and (D) pyrimidine-imprinted microspheres (PYMMIP).

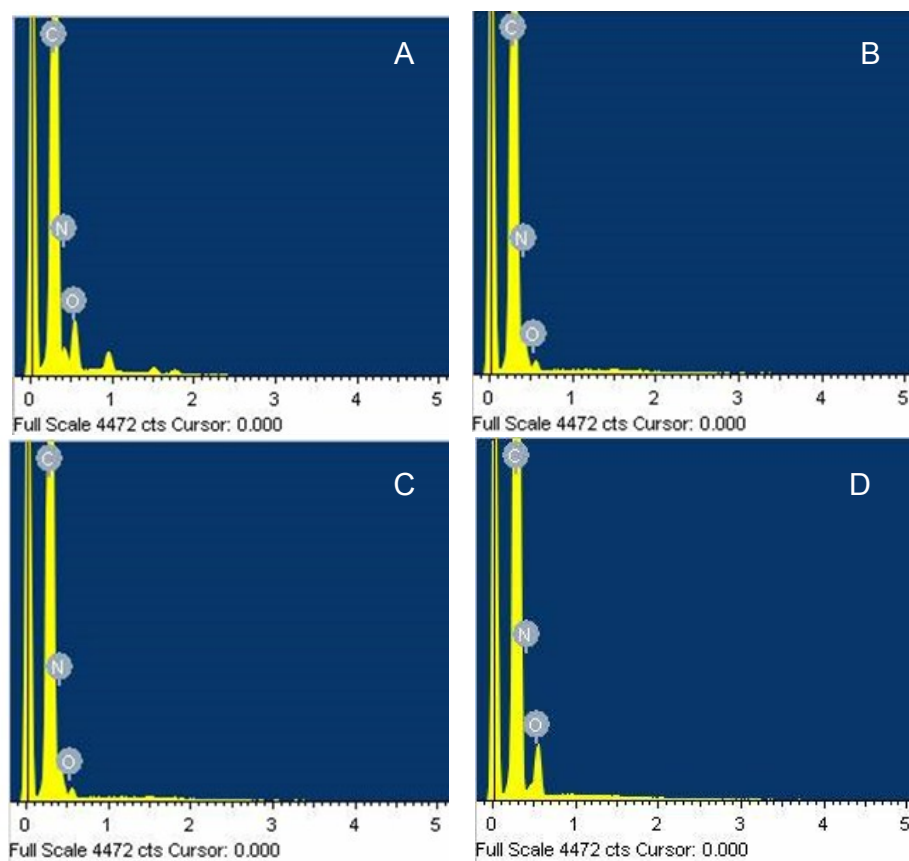

**Fig. S4** Energy Dispersive Spectroscopy (EDS) of (a) non-imprinted microspheres, (b) pyrimidine imprinted microspheres, (c) carbazole imprinted microspheres, and (d) quinoline imprinted microspheres.

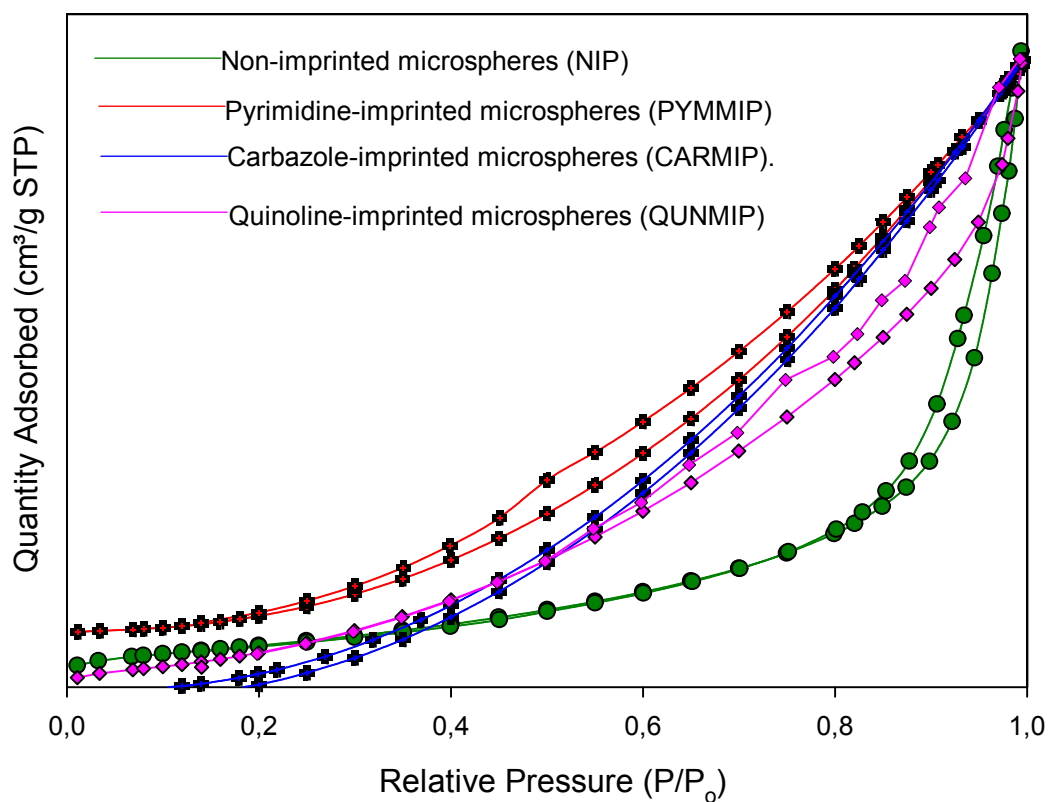

**Fig S5.** BET Isotherm of (A) Non-imprinted microspheres (NIP), (B) quinoline-imprinted microspheres (QUNMIP), (C) pyrimidine-imprinted microspheres (PYMMIP) and (D) carbazole-imprinted microspheres (CARMIP).

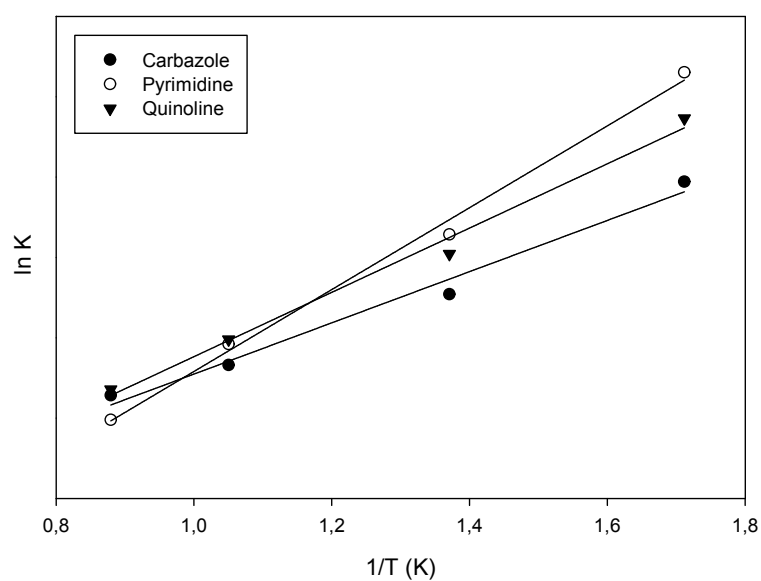

**Fig S6.** Van't Hoff Plot of adsorption equilibrium constant  $K_{ad}$  for adsorption of organonitrogen compounds onto imprinted microspheres.

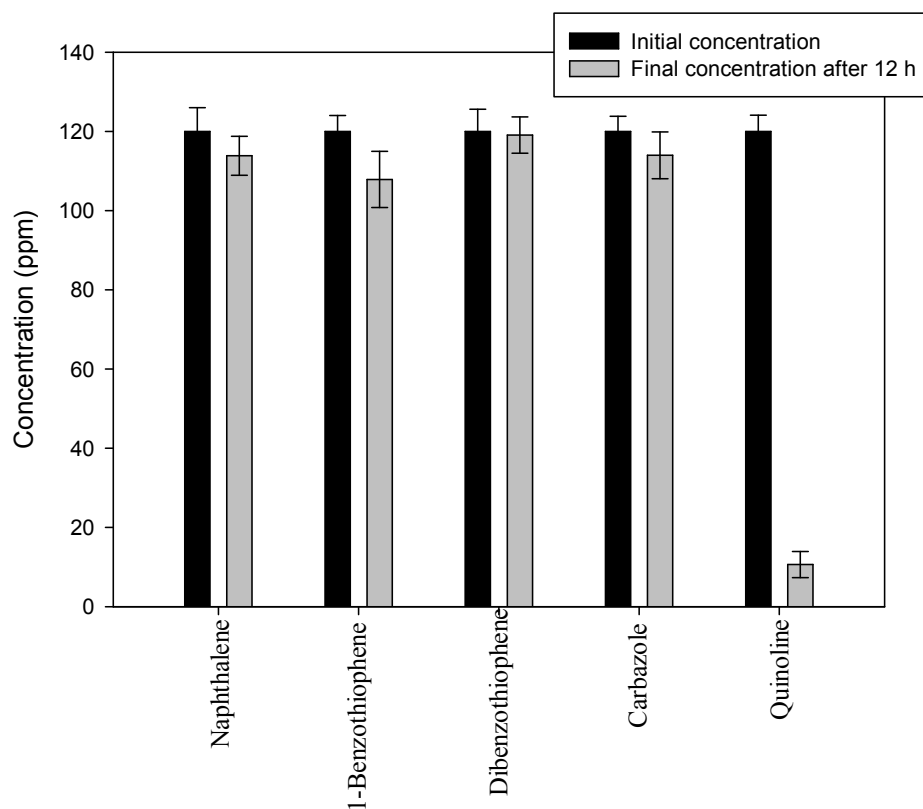

Fig S7. Adsorption selectivity of quinoline using quinoline-imprinted microspheres.

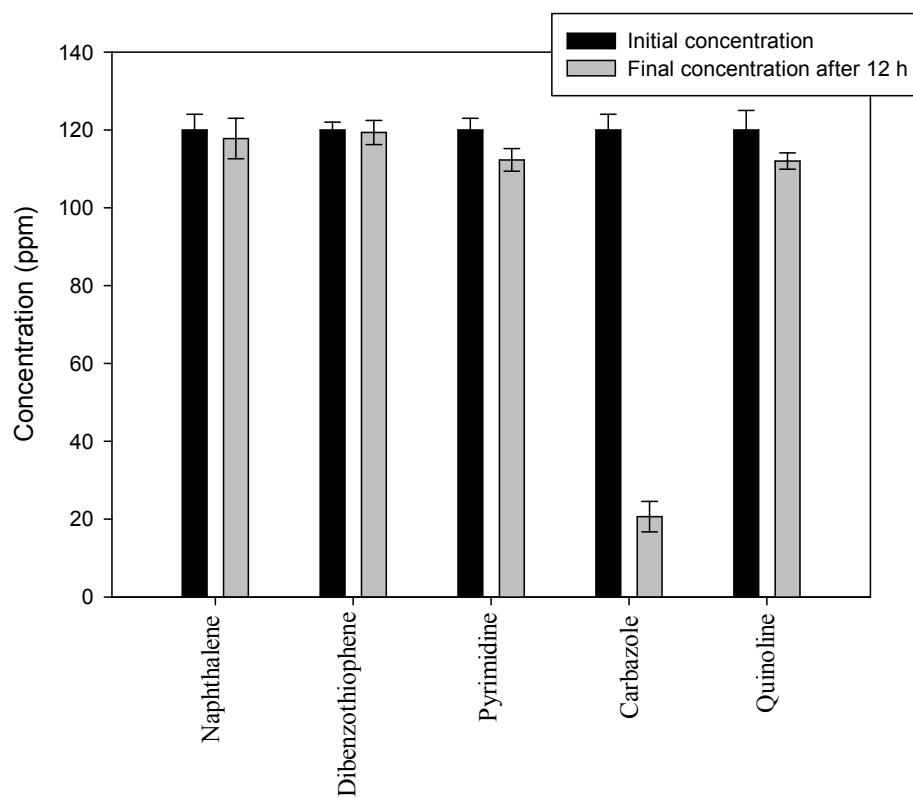

Fig S8. Adsorption selectivity of carbazole using carbazole-imprinted microspheres.

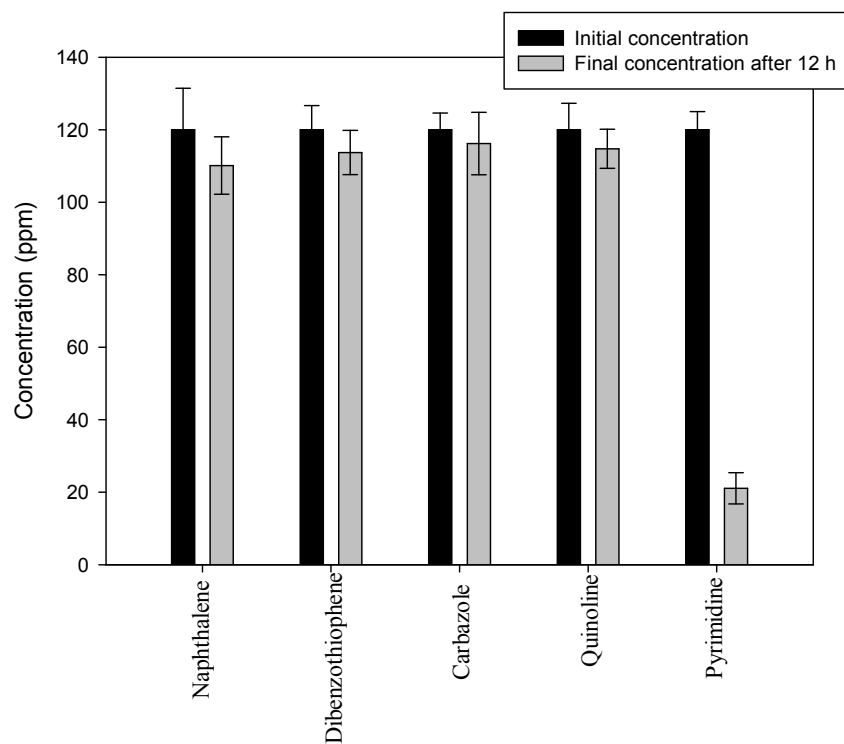

Fig S9. Adsorption selectivity of pyrimidine using pyrimidine-imprinted microspheres.

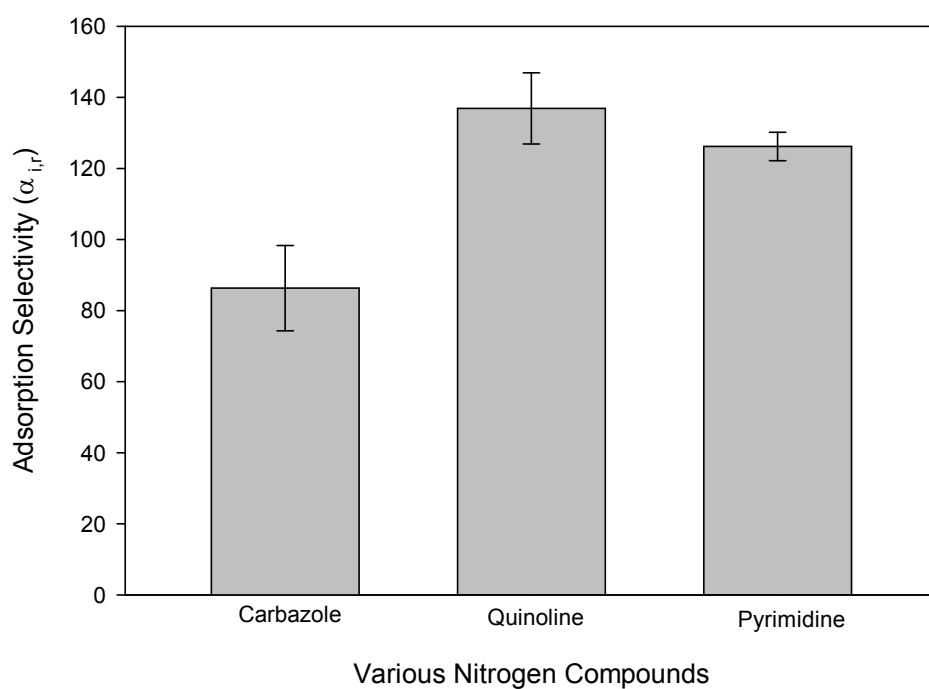

Fig. S10. Adsorption selectivity of imprinted microspheres (MIPs) after 5 h adsorption time.



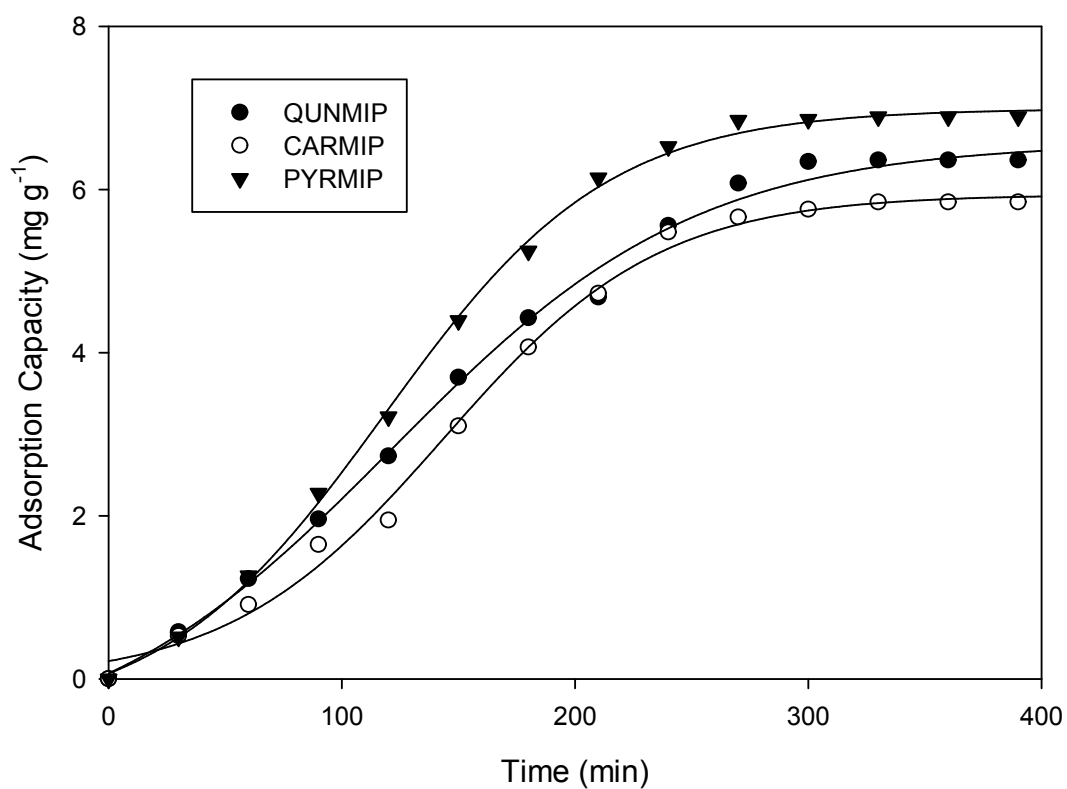

Fig S11. Kinetic of adsorption of the various nitrogen compounds over imprinted microspheres.

**Table S1.** Imprinting factor microspheres

| Adsorbents | Qe (NIP) | Qe (MIP) | Imprinting Factor (k) |
|------------|----------|----------|-----------------------|
| Pyrimidine | 0.2      | 6.3      | 26.3                  |
| Quinoline  | 0.3      | 6.8      | 21.9                  |
| Carbazole  | 0.4      | 5.8      | 16.6                  |

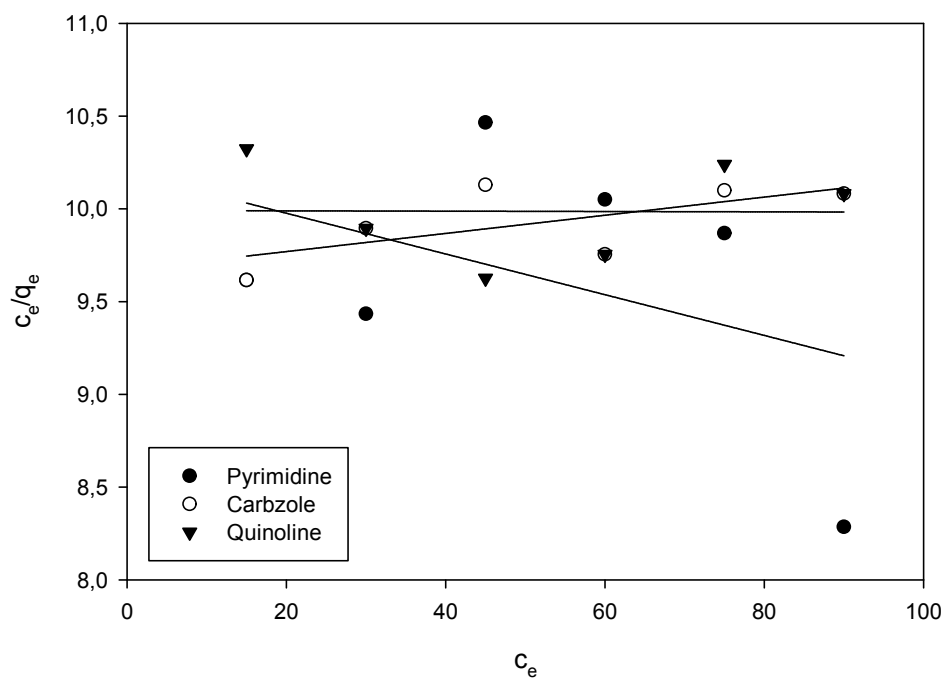

Fig. S12. Langmuir plot for (A) carbazole, (B) quinoline and (C) pyrimidine.

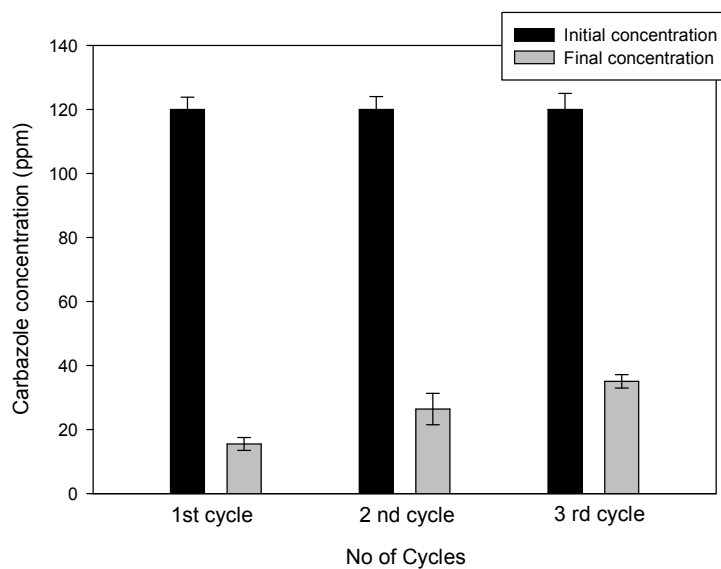

Fig. S13. Reusability studies on the use of carbazole-imprinted microspheres for the adsorption of carbazole.

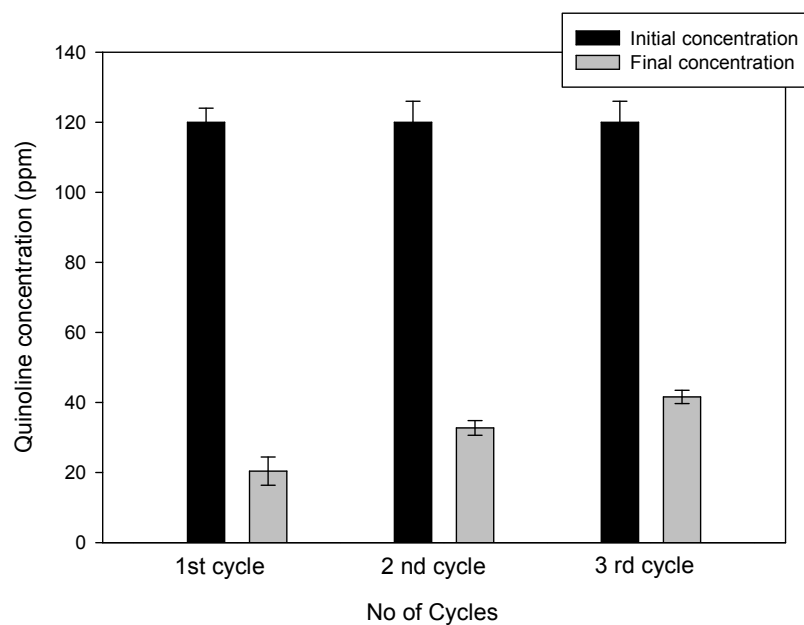

Fig. S14. Reusability studies on the use of quinoline-imprinted microspheres for the adsorption of quinoline.

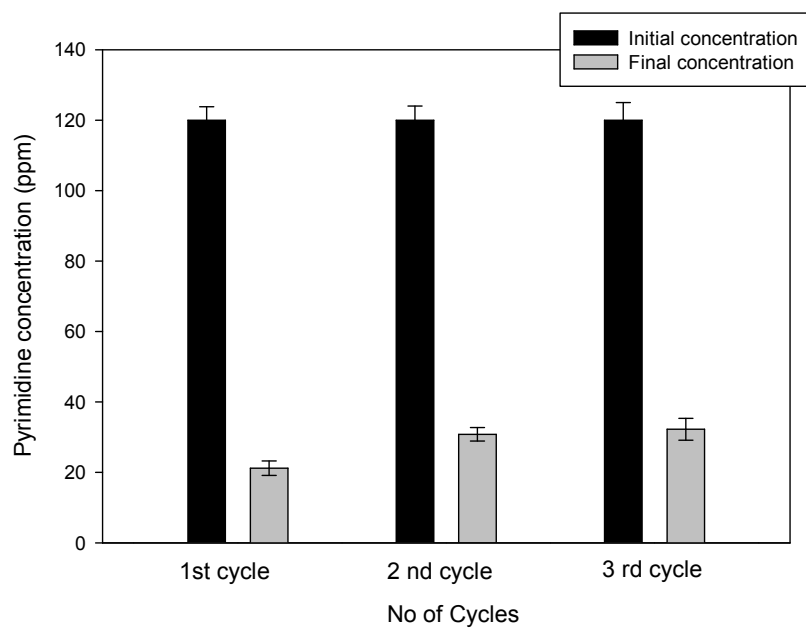

Fig. S15. Reusability studies on the use of pyrimidine-imprinted microspheres for the adsorption of pyrimidine.

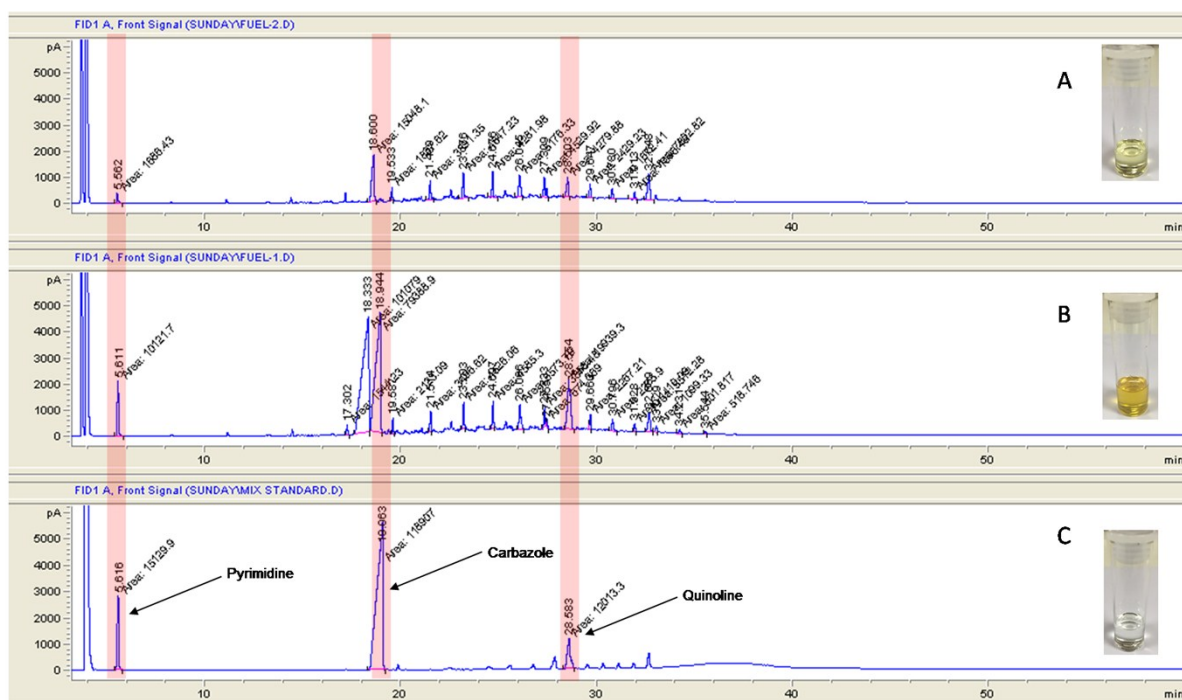

Fig. S16. GC-FID chromatograms of (A) diesel fuel after MIPs removal; (B) diesel fuel containing target nitrogen containing compounds before applying MIPs and (C) target nitrogen containing compounds (Inset: images of the fuel).

Conditions: Agilent 7890A gas chromatograph fitted with flame ionization detector (GC-FID). Column: DB 5 (30 m x 0.25 mm x 0.25  $\mu$ m); Inlet temperature: 250°C; Carrier Gas and flow rate: Helium at 20 cm/s; Make-Up Gas and flow rate: Nitrogen at 30 mL/min; Split Ratio: 100:1; Column Temperature profile: Hold at 100°C for 5 minutes. Ramp to 240°C at 5°C/min. Hold at 240°C for 30 min.
